# Supplementary material for: Chronology of cellular events related to mitochondrial burnout leading to cell death in Fuchs endothelial corneal dystrophy
Source: PubMed Central journal article supplement (PMC7118119; doi:10.1038/s41598-020-62602-x), 2020-04-02
Supplement: 41598_2020_62602_MOESM1_ESM.pdf [file 41598_2020_62602_MOESM1_ESM.pdf]

## Supplementary material

### Chronology of cellular events related to mitochondrial burnout leading to cell death in Fuchs endothelial corneal dystrophy

Sébastien Méthot<sup>1,2</sup>, Stéphanie Proulx<sup>1,2,3</sup>, Isabelle Brunette<sup>4,5</sup>, Patrick J. Rochette<sup>1,2,3,\*</sup>

1. Centre de Recherche du CHU de Québec – Université Laval, Axe Médecine Régénératrice, Hôpital du Saint-Sacrement, Québec, Canada
2. Centre de recherche en organogénèse expérimentale de l'Université Laval/LOEX, Québec, Canada
3. Université Laval, Faculté de Médecine, Département d'Ophtalmologie, Université Laval, Québec, Canada.
4. Maisonneuve-Rosemont Hospital Research Center, Montreal, Québec, Canada
5. Department of Ophthalmology, University of Montreal, Montreal, Québec, Canada

\* Corresponding author:

Dr. Patrick J. Rochette

Centre de recherche du CHU de Québec – Université Laval

Axe médecine Régénératrice

Hôpital du Saint-Sacrement, Bureau H2-10

1050 Chemin Sainte-Foy, Québec, Qc, Canada, G1S 4L8

Phone: (418) 682-7568

E-mail: Patrick.rochette@orlo.ulaval.ca

## **Supplemental material and methods**

### **UVB irradiation and apoptosis analysis**

Corneal endothelial explants from cadaveric eyes were placed in PBS and irradiated or not with 40 kJ/m<sup>2</sup> UVB to induce apoptosis. UVB irradiation system consists of RPR-3000 UVB lamps (Southern New England Ultraviolet Co.) with an emission peak of 300 nm. A cellulose acetate sheet (Kodacel TA-407, clear 0.015 in.; Eastman-Kodak Co.) was used to filter out wavelength below 295 nm. Sixteen hours post-UVB, apoptosis was measured using CellEvent Caspase-3/7 Green detection assay (Invitrogen) at a concentration of 5 μM and mitochondria were labeled using Mitotracker Deep Red FM at a concentration of 80 nM (Invitrogen).

Supplemental figure

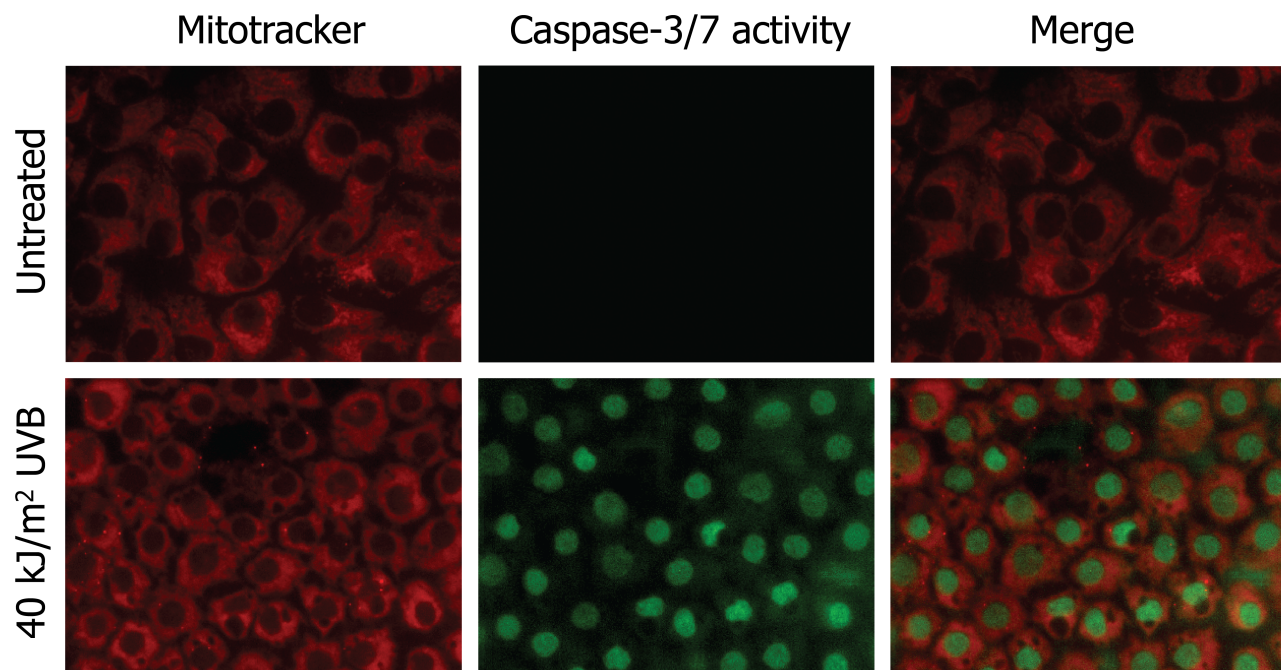

**Fig S1: UVB-induced apoptosis in corneal endothelial explants.** Corneal endothelial explants from cadaveric human eyes has been irradiated with 40 kJ/m<sup>2</sup> UVB or unirradiated (untreated). Sixteen hours post-irradiation, a marker of cell death by apoptosis (caspase-3/7 activity; green) was used in conjunction with the mitochondrial mass marker (mitotracker; red). Nuclear green labeling of all cells in the explant following UVB-exposure shows a strong induction of apoptosis in corneal endothelial cells.

**Supplemental table**

Table S1. Classification of age and sex of healthy and FECD donors used in this study by figures.

| Healthy (H) or FECD (F) | Age | Sex    | Figure | Number of Fields |
|-------------------------|-----|--------|--------|------------------|
| F                       | 66  | Male   | 2.6    | 8                |
| F                       | 73  | Female | 2.6    | 8                |
| F                       | 90  | Female | 2.6    | 11               |
| H                       | 70  | Female | 2.6    | 12               |
| H                       | 77  | Female | 2.6    | 8                |
| H                       | 78  | Male   | 2.6    | 8                |
| F                       | 61  | Female | 3      | 8                |
| F                       | 71  | Female | 3      | 9                |
| F                       | 71  | Female | 3      | 8                |
| H                       | 64  | Female | 3      | 7                |
| H                       | 61  | Female | 3      | 11               |
| H                       | 82  | Female | 3      | 10               |
| F                       | 57  | Female | 4      | 7                |
| F                       | 72  | Female | 4      | 8                |
| F                       | 58  | Male   | 4      | 10               |
| F                       | 67  | Female | 4      | 7                |
| H                       | 56  | Male   | 4      | 7                |
| H                       | 60  | Male   | 4      | 9                |
| H                       | 81  | Female | 4      | 11               |
| F                       | 55  | Female | 5      | 8                |
| F                       | 70  | Male   | 5      | 9                |
| F                       | 74  | Female | 5      | 7                |
| H                       | 61  | Female | 5      | 7                |
| H                       | 64  | Female | 5      | 8                |
| H                       | 82  | Female | 5      | 11               |
| H                       | 66  | Female | Sup 1  | -                |
